# Supplementary material for: Deficiency of AtGFAT1 activity impairs growth, pollen germination and tolerance to tunicamycin in Arabidopsis
Source: PubMed Central journal article supplement (PMC6436160; doi:10.1093/jxb/erz055), 2019-02-18
Supplement: erz055_suppl_supplementary_data.pdf [file erz055_suppl_supplementary_data.pdf]

I'm sorry that I can't make it clear. The given and family names for the authors are highlighted in blue and yellow, respectively, as shown below, and the middle name is not highlighted.

**Kien Van Vu,**

**Chan-Young Jeong,**

**Thuy Thi Nguyen,**

**Trang Thi Huyen Dinh,**

**Hojoung Lee,**

**Suk-Whan Hong.**

I would appreciate it if the name of the funding organization in the Acknowledgements remains unchanged.

**Table S1. List of primers used in this work**

| Name                  | Oligo sequence 5' to 3'        | Restriction enzyme site | Purpose                                                       |
|-----------------------|--------------------------------|-------------------------|---------------------------------------------------------------|
| LBb1                  | GCGTGGACCGCTTGCTGCAACT         |                         | Left border primer for identification of T-DNA                |
| P1 (GFAT1-1:F)        | TAGGGACAGTGGCTAGTGGCC          |                         | Genotyping                                                    |
| P2 (GFAT1-1:R)        | GCTCACCATGAGTAGCCCACC          |                         |                                                               |
| P3 (GFAT1-2:F)        | CTCAATCTTCTGGTCCTGGAG          |                         |                                                               |
| P4 (GFAT1-2:R)        | ACCGCAGTTGCTTACAAACCC          |                         |                                                               |
| P5 (GFAT1-3:F)        | GCGTGGATAGTGGCACAGTTG          |                         |                                                               |
| P6 (GFAT1-3:R)        | TCAGCCCACCTAAGAGGACGG          |                         |                                                               |
| QRT1-4:F              | GAGCTGTTGATATGGTTCCTG          |                         |                                                               |
| QRT1-4:R              | CTAAGTAAATCTGCCAGTAC           |                         |                                                               |
| pGFAT1:F              | CAATGAAGCTTTACTATTCTG          | HindIII                 | Making <i>pGFAT1::GUS</i> and <i>pGFAT1::GFAT1</i> constructs |
| pGFAT1:R              | CGGATCCTTGAAAGAAAATGTTTCTCAG   | BamHI                   |                                                               |
| GFAT1 cDNA:F          | CGGATCCATGTGTGGAATCTTCGCG      | BamHI                   | Making <i>pGFAT1::GFAT1</i> and <i>GFAT1</i> OE constructs    |
| GFAT1 cDNA:R          | CGAGCTCCTATTGAGTAGTCACACT      | SacI                    |                                                               |
| GFAT RNAi Sense:F     | GGGCGCGCCGCTACTCATGGTGAGCCAGCT | Ascl                    | Making <i>GFAT1</i> RNAi construct                            |
| GFAT RNAi Sense:R     | GATTTAAATGTTCCACTGAAGCAGGTCTCG | Swal                    |                                                               |
| GFAT RNAi antisense:F | GTCTAGAGCTACTCATGGTGAGCCAGCT   | Xbal                    |                                                               |
| GFAT RNAi antisense:R | GGGATCCGTTCCACTGAAGCAGGTCTCG   | BamHI                   |                                                               |
| ACTIN2:F              | GTGTGTCTTGTCTTACTCGGTTCCG      |                         | RT-PCR and qRT-PCR                                            |
| ACTIN2:R              | AATAGCTGCATTGTCACCCGATACT      |                         |                                                               |
| GFAT1:F               | ACAGTGAAGGAATACTTGCAG          |                         |                                                               |
| GFAT1:R               | TTGAGTAGTCACACTCTTTGC          |                         |                                                               |
| CNX1:F                | CTCGTCGCCATTGTGGTTGTA          |                         |                                                               |
| CNX1:R                | CCGTCTTCACATACATATTCC          |                         |                                                               |
| BIP1/2:F              | AATGCCCTGGAGACATACGTG          |                         |                                                               |
| BIP1/2:R              | CTCCTCAGTCGATGATTCTCC          |                         |                                                               |
| BIP3:F                | GAAGATGACGAGGAACAAAGC          |                         |                                                               |
| BIP3:R                | TTCCAAGAAAGCTTCAGCTG           |                         |                                                               |

**Table S2.** Number of siliques per plant and seeds per silique in wild-type, *gfat1-1*, *AtGFAT1* overexpression and RNAi lines

| Lines             | Number of seeds per one silique | Number of siliques per one plant |
|-------------------|---------------------------------|----------------------------------|
| Col-0             | 50.2 ± 2.1                      | 108.6 ± 12.3                     |
| <i>gfat1-1</i>    | 51.5 ± 1.7                      | 106.2 ± 9.5                      |
| <i>GFAT1</i> OE   | 50.0 ± 1.6                      | 104.7 ± 11.6                     |
| <i>GFAT1</i> RNAi | 29.8 ± 2.2                      | 29.5 ± 4.9                       |

The values are mean ± SD (n = 50 for seeds per one silique; n = 10 for siliques per one plant)

```

At 1 MCGIFAYLNFNHANKERRYILDVLENGLRRLLEYRGYDSAGIADNS-----PSSSPLVF
Mm 1 MCGIFAYLNHYVPTTRREILETLKGLQRLEYRGYDSAGVLDGGNKKWEANACKQLL
Ce 1 MCGIFAYLNFLTPKRSEIVDILVQGLQRLEYRGYDSAGIADGNSNEIES--PHSSVALL
Ec 1 MCGIVGAT-----AQRDVAVILLLEGLRRLLEYRGYDSAGIADVDAEG-----HMTFL

At 55 RQAGNIESIVNSVNEETINTDLNLDVEFYFHAGIAHTRWATHGEPAPRNSHPQSSGPGDD
Mm 61 KKKGKVKALDEEVH---KQDDLDLDEFDVHLGIAHTRWATHGEPNPVNSHQRSTKKNNE
Ce 59 RKAGKVSFLSDFIHE---SSDLDMMEYNIHCGIAHTRWATHGSPRDVNSHHRNSDNNE
Ec 47 RFLGKVOVLAQAABE-----HPLHGGTGLIAHTRWATHGEPSEVNAHHVSE---H

At 115 FLVVHNGVITNYEVLKETLVRHGTFESDTDTEVIEKLAKFVFDKANEEGGQTVTFCEV
Mm 118 FIVIHNGIITNYKDLKKELESKGYDFESETDTEIAKLVKMYMDNWE---SQDVSFTTLV
Ce 117 FLVVHNGIITNYREIKENLEKKGHKFESETDTEVIAKLAQHEDRY----PDFSFRQLV
Ec 94 IVVVHNGIIEENHEELAEELKARGYTFVSETDTEVIAHLVNEELK-----QGGTLREAV

At 175 FEVMRHLLEGAYALFKSWHPNELACKLGSPLLGVKELDQGESNSH-----
Mm 175 ERVIQQLLEGAFALVFKSVHFPQAVGTRRGSPLLIGVRSEHLESTDHPIPLVTRTARTQIG
Ce 172 ETVIQQLLEGAFALAFKSSRFPGQLVARRGSPLLVGTKNSRLQTNHFPVSKDA---G
Ec 147 IRAIEQVLRGAYGTVIMDSRHPDTLFAARSGSPLVIGLGMG-----

At 223 -----VF-----DQ
Mm 235 STWWSQAE-RGKD-----KKGSCGSRVDSTTC
Ce 229 WK-WGDEKQTDGRRFMSNHATHLRDETSFVETPNNILDLSIAVRSSNGSARKEISDSTTA
Ec 187 -----

At 227 AHFLSKNDHPKEFFLSSEPHALVEHTKQVLLVEDGEVNVNLDKGGVSVILKFNERRCNGL
Mm 263 --LFPVBEKAVEYVYFASDASAVIEHTNRVIFLEDDVAAVVDGRFSIHRIRRTAGD----
Ce 288 VRPFDSDDWEVEYFVASDAAALIEHTKQVLFLEDDVAFVEDGALTIHRIERHADN----
Ec 187 -----ENFASDQLALLPVTRRFIFLEEGDIAEITRRSVNIFDKKIG-----

At 287 SRPASVERALSVLEMEVEQISKGKIDHYMQKEIFEQPESTITMTRGRLRGSRRKTKTVL
Mm 317 ----HPCRAVQTLQMELOQIMKGNSSSEMQKEIFEQPESVVNTMRGRVNF----DYTVN
Ce 344 ---GEQKREVKLEMELEQIMKGSFRTYMQKEIFEQPSVVNTMRGRVLP-----GQVV
Ec 228 ---AEVKRQDIESNLQYDAGDKGIYHYMQKEIFEQNAIKNTTGRISHGQ-----VD

At 347 LGGLKDHLKTIRRSRRIVFICGTSYNALASREILEELSGLPVSMELASDLWDROGPI
Mm 369 LGGLKDHLKEIQRCRRLLIACGTSYHAGVARTQVLEELTELPVMVELASDFLDRNTPV
Ce 396 LGGIKKYLFDIKRCRRIMVACGTSYHSAIACRQVLEELSGLPVVVELASDFLDRETPI
Ec 279 LSELGPNADLLSRVEHQILACGTSYNSGMVSRVWFESLAGIECDVELASDFRYRKSAV

At 406 YREDTAVFVSQSGETADTLLALDYARENGALC-VGITNTVGSSIAKTHCGVHINAGAEI
Mm 428 FRDDVCFVFSQSGETADTLMGLRYCKERGALT-VGITNTVGSSISRETDGCVHINAGPEI
Ce 455 FRDDVCFVFSQSGETADTLLALRYCKERGALT-VGITNTVGSSICRETHCGVHINAGPEI
Ec 339 RRNSMILVFSQSGETADTLAGLRLSKELGYLGSALICNVFGSSIVRESDLAIMTNAGTEI

At 465 GVASTKAYTSQIVVMYMLALAIGSDTISSQKRREIIDGLLDLKYKVEVLKLDDEMKDL
Mm 487 GVASTKAYTSQEVSLMEALMCMDDRISMQRREIILGLKRLPLIKEVLSMDEEIQKL
Ce 514 GVASTKAYTSQILSLIMEALTLSDDRISMQRREIIDALDLPELIREVLQDKEVLDI
Ec 399 GVASTKALTTQLITVLLMLVAKLSRLKGLDASIEHIVHGLCALBSRIEQMLSDKRRTEAL

At 525 AQLLIDEQSLVFGRGYNYATALEGALKVKEVALMHSEGILAGENKKGPLALVDENLPIA
Mm 547 ATELYHQKSVLIMGRGYEYATCLEGALKIKEIYMHSEGILAGELKHGPLALVDKLMPIVI
Ce 574 AKQTYREKSLIMGRGLNATCLEGALKIKEISYMHCEGIMS GELKHGPLAVDFEFLSIC
Ec 459 AEDFSDKHHALFLGRGDPYPIALEGALKLKEISYTHAEAYAAGELKHGPLALVDADMPVI

At 585 VIATRDAEFSKQOSVITQTHARKGRIVMCSKGDAAVSSSGSCRAIEVPGVVDCLQPVV
Mm 607 MIIMRDTYAKQNALQQVVARQGREVVICDKEDTE--TIKNKRTIKVPHSVDCLOGIL
Ce 634 MVVCNDRVYKKS LNALQQVVARKGAFI IADCTVEEG-DLAGMKHILRVPKTVDCVQNIL
Ec 519 VVAPNNELEKLLKSNIEEVRARGGQLYVFADQFA--GFVSSDNMHIEMPHVEVIAPIF

At 645 NIVPLQLLAYHLTVLRGHNVDQPRNLAKSVTIQ
Mm 665 SVIPLQLLAHLAVLRGYVDVDFPRNLAKSVTVE
Ce 693 TVIPLQLLSYHTAELNGANVDRPRNLAKSVTVE
Ec 577 YTVPLQLLAYHVALIHGTLVDQPRNLAKSVTVE

```

**Supplementary Figure S1.** Multiple alignment of amino acid sequences of L-glutamine D-fructose-6-phosphate amidotransferase (GFAT). At, *Arabidopsis thaliana* GFAT (At3g24090); Mm, *Mus musculus* GFAT (P47856); Ce, *Caenorhabditis elegans* GFAT (Q19130); Ec, *Escherichia coli glmS* GFAT (P17169). The black-filled boxes and the gray-filled boxes indicate identical and similar residues, respectively.

*qrt1-4/qrt1-4*

*qrt1-4/qrt1-4 gfat1-2+/-*

A

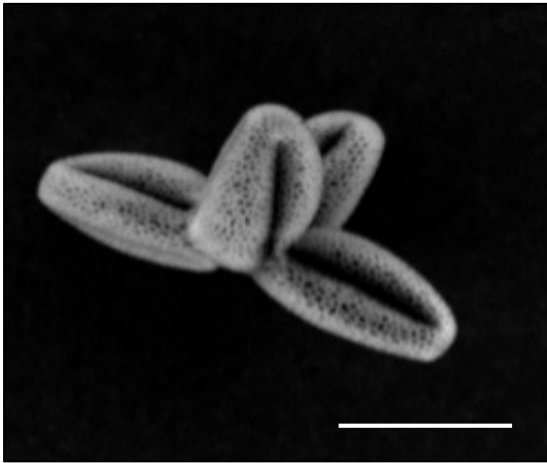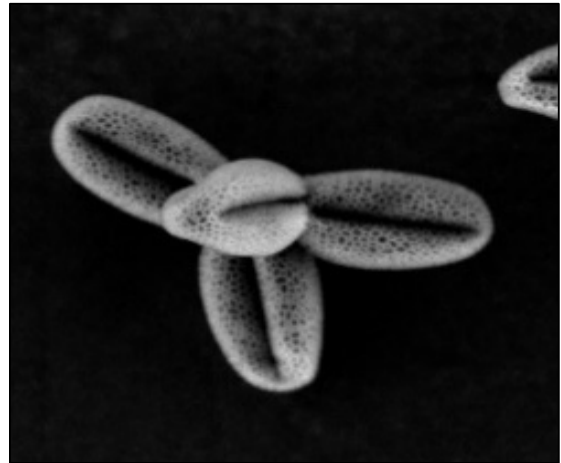

B

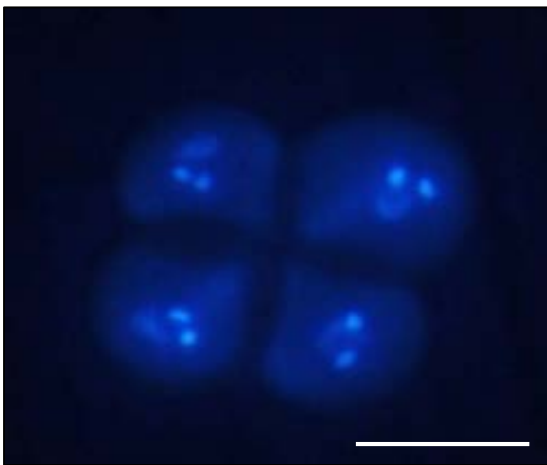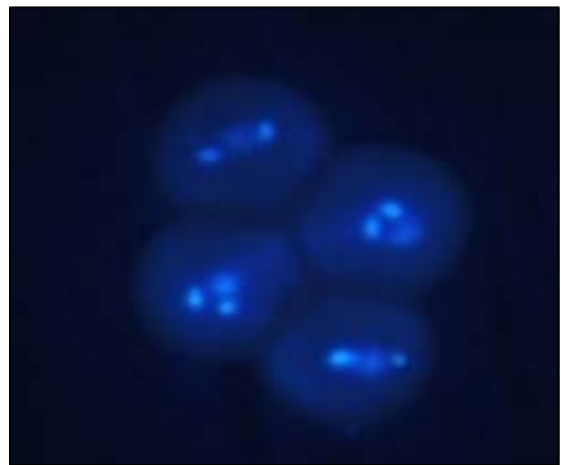

C

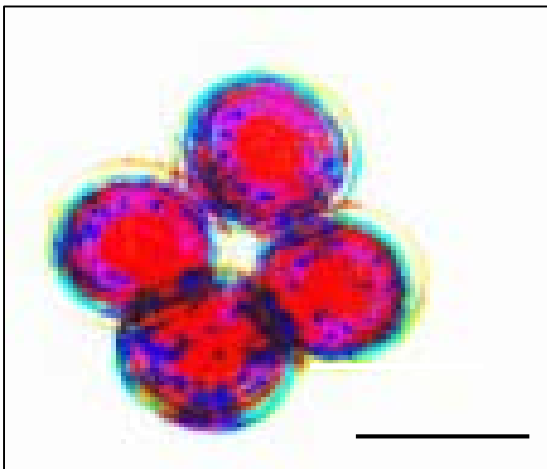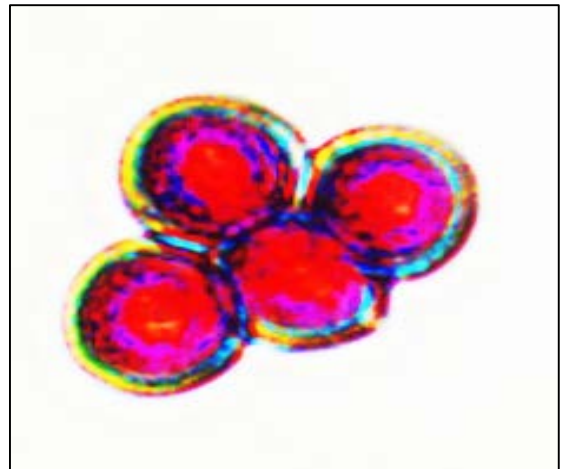

**Supplementary Figure S2.** The *gfat1-2* mutation has no effect on morphology, nuclear division, and viability of pollen quartets at the tricellular stage. (A) Scanning electron microscopy (SEM) imaging of pollen quartets from *qrt1-4/qrt1-4* and *qrt1-4/qrt1-4 gfat1-2+/-* plants. (B) DAPI staining analysis of pollen quartets. (C) Alexander staining analysis of pollen quartets. Scale bars: 20  $\mu$ m.



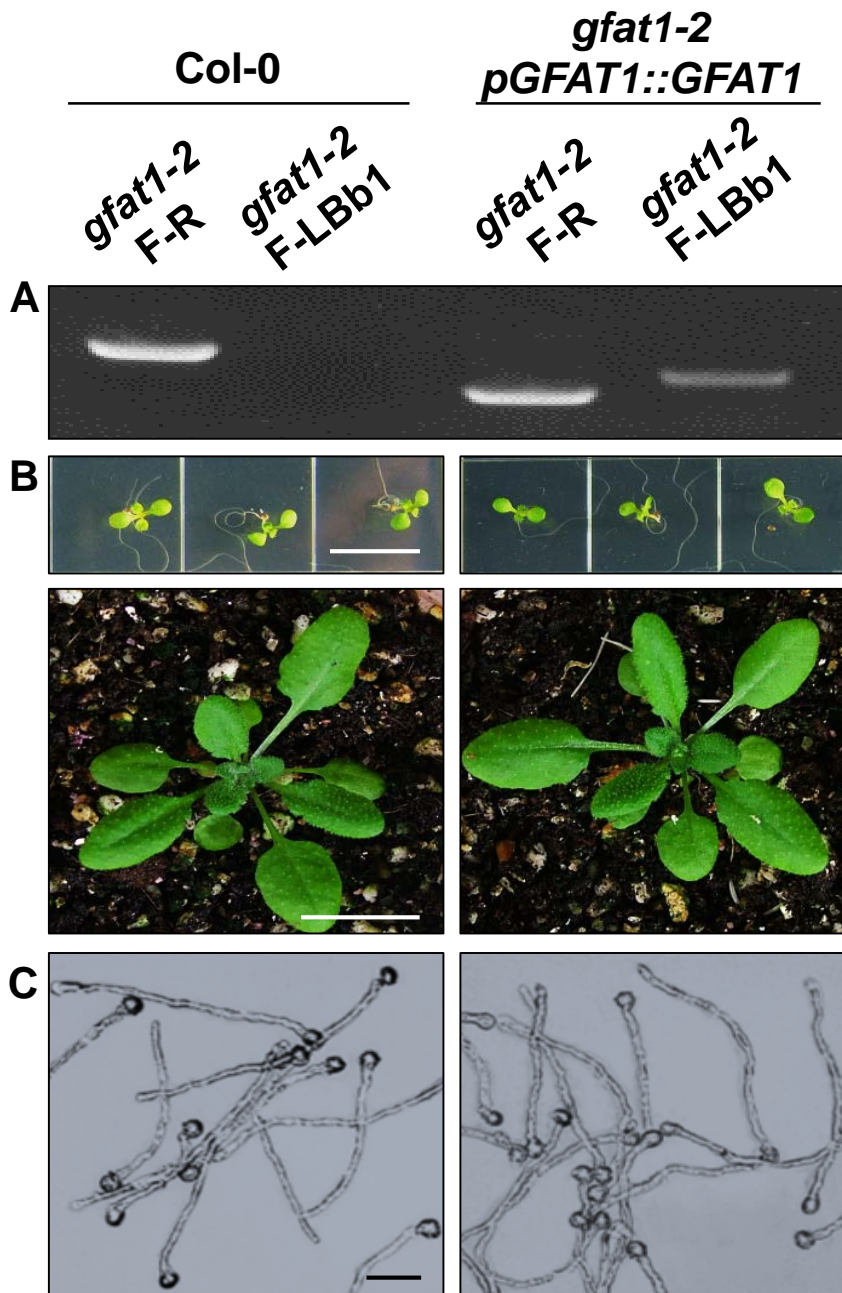

**Supplementary Figure S3.** Complementation of male gametophytic defect of *gfat1-2/+* plants by introduction of *pGFAT1::GFAT1*. (A) PCR analysis for distinguishment of *AtGFAT1* cDNA and genomic DNA using the *gfat1-2* F and *gfat1-2* R primers and for identification of T-DNA insertion using the *gfat1-2* F and LBb1 primers. Genomic DNA was extracted from leaves of 4-week-old plants. As expected, the 641-bp T-DNA specific and the 475-bp *AtGFAT1* cDNA-specific PCR products were amplified from *gfat1-2/gfat1-2* plants. However, the 915-bp gene-specific PCR products, including intron, was not amplified in the *gfat1-2 /gfat1-2* mutant plants. In contrast, wild-type plants yielded only the 915-bp gene-specific PCR products including intron. (B) 10-day-old and 4-week-old plants of the complementation line (*gfat1-2 pGFAT1::GFAT1*) displayed no detectable differences under normal conditions compared to the wild-type plant (Col-O). (C) *In vitro* germination of pollen grains from wild-type and the complementation plants. Scale bars: 1.5 cm (B), 50  $\mu$ m (C).

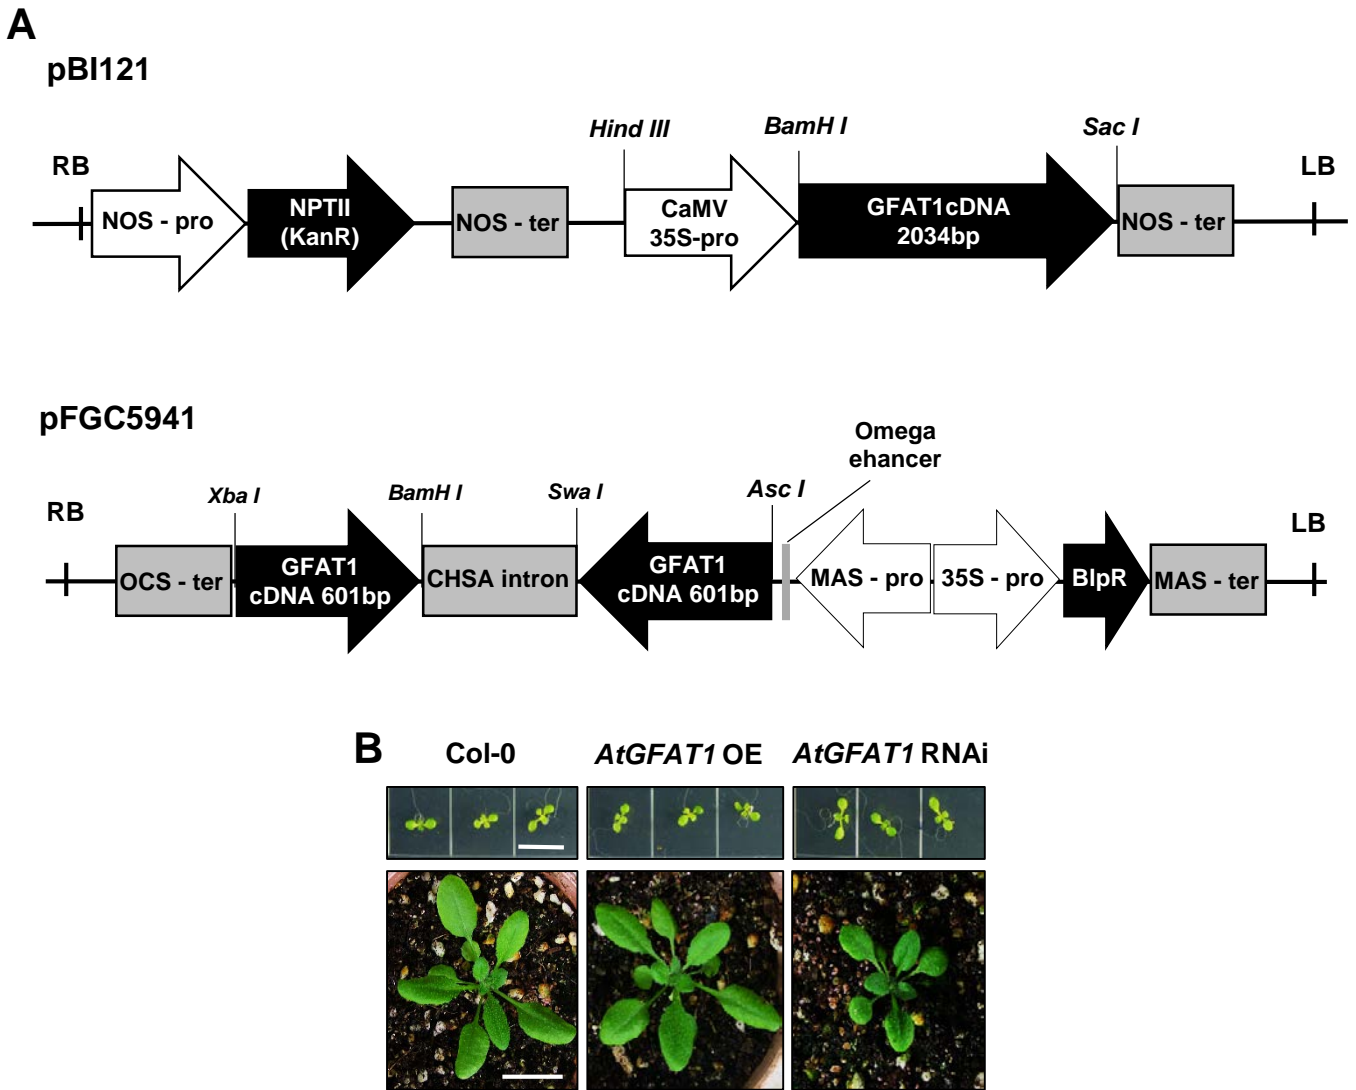

**Supplementary Figure S4.** Construction of *AtGFAT1* overexpression and RNAi suppression lines.

(A) The schematic diagrams for construction of *AtGFAT1* overexpression and RNAi constructs. Full-length *AtGFAT1* cDNA was placed under the control of the cauliflower mosaic virus 35S (CaMV35S) promoter in pBI121 vector to make the *AtGFAT* overexpression (OE) construct, and the *AtGFAT1* RNA interference (RNAi) construct was produced containing an inverted repeat of a 601 bp DNA fragment of *AtGFAT1* cDNA in the pFGC5941 vector. These constructs were transformed into wild-type *Arabidopsis* using the *Agrobacterium* strain GV3101. We selected three independent homozygous lines of transgenic plants carrying a single copy of the transformed construct at T3 generation for detailed analyses. (B) Photographs of representative 10-day-old and 4-week-old plants of wild-type and transgenic plants. Scale bars: 1.5 cm.

### GFAT1 promoter

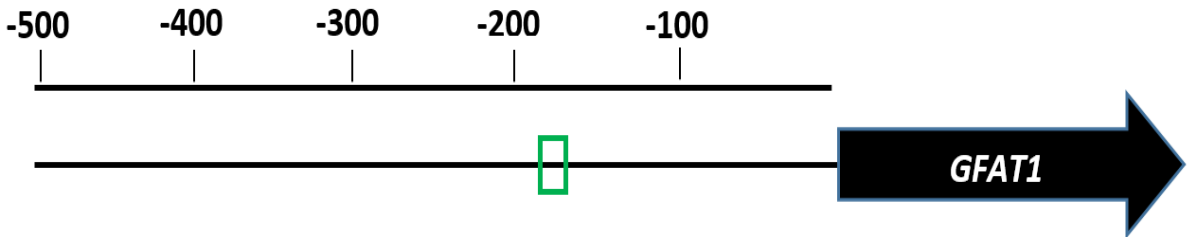

```
-350   aaaacagagagattcctaattatgaattgatttttactgtattttaattat
-300   gaattgatctgaacttagggacagtggctagtggcctatatcagcacgtg
-250   aactagccacgcgtagcggttccgctccaacaaaaaagcaaactcgcta
-200   tctgtccaatcaggaacaaccacgtcatagctcctgacagaagtgaaaa
-150   gacgaaactatcCaaacttatggatcgtatttacaagtcaaacccaaat
-100   ctgagtcaaaaaataagaatctcaccggttccttacttcttcttcatcttc
-50    cctcgaaaaactgagaaacatTTTTCTTCAAAGAGAGATTACAACAACC
+1     ATG
```

**Supplementary Figure S5.** Schematic representation of predicted promoter sequence of *AtGFAT1*. Line and arrow indicate the promoter and the coding region of *AtGFAT1*, respectively. Green box indicates the relative location of the ERSE motif in the *AtGFAT1* promoter. The nucleotide sequences of the ERSE motif in the promoter are represented in green color. The A of ATG, the translation initiation codon, is set to +1 to determine the position of the promoter sequence.



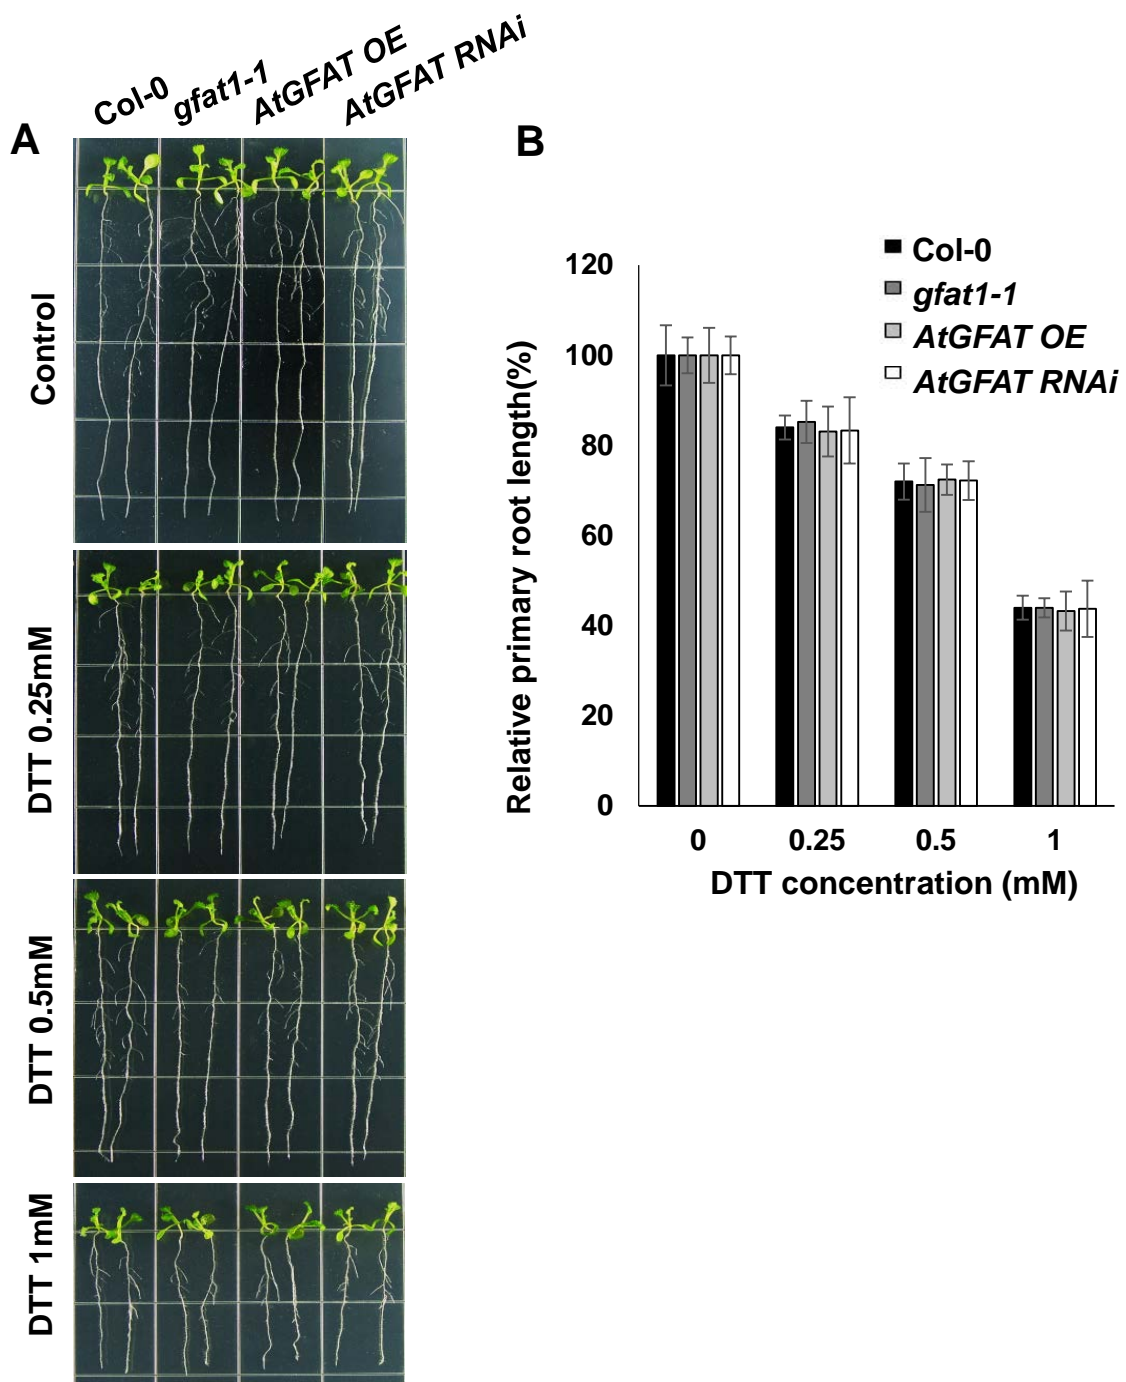

**Supplementary Figure S6.** The effect of DTT on the primary root growth of wild-type, *gfat1-1*, *AtGFAT1* OE, and RNAi lines. (A) Wild-type, *gfat1-1*, *AtGFAT1* OE, and RNAi seedlings were vertically grown for 10 days on  $\frac{1}{2}$  MS media supplemented with a range of DTT concentrations. Representative pictures of 10-day-old seedlings were taken. (B) The primary root length grown under DTT treatment was represented as a relative value for the root grown in normal conditions. Values represent means  $\pm$  SE of three repeats ( $n \geq 20$  per repeat).
